# Supplementary material for: Distribution and fluxes of marine particles in the South China Sea continental slope: implications for carbon export
Source: Copernicus journal article supplement (doi:10.5194/bg-22-6309-2025), 2025-11-04
Supplement: Supplementary file 1 [file bg-22-6309-2025-supplement.pdf]

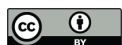

*Supplement of*

## **Distribution and fluxes of marine particles in the South China Sea continental slope: implications for carbon export**

**Shujin Guo et al.**

*Correspondence to:* Xiaoxia Sun (xsun@qdio.ac.cn)

The copyright of individual parts of the supplement might differ from the article licence.

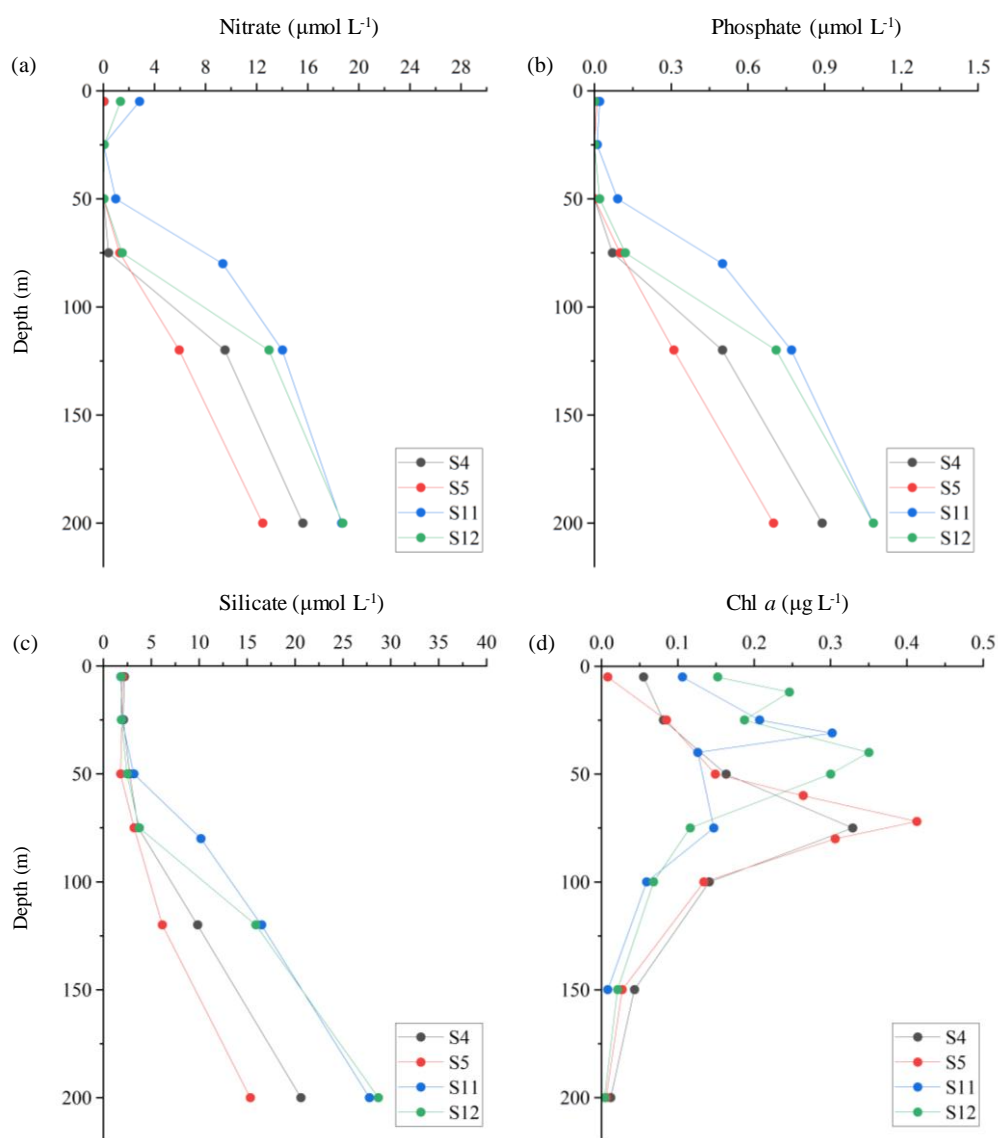

Fig. S1. Vertical distributions of nutrients and Chl *a* concentrations at stations S4, S5, S11, and S12. a: nitrate ( $\mu\text{mol L}^{-1}$ ); b: phosphate ( $\mu\text{mol L}^{-1}$ ); c: silicate ( $\mu\text{mol L}^{-1}$ ); d: Chl *a* ( $\mu\text{g L}^{-1}$ ).

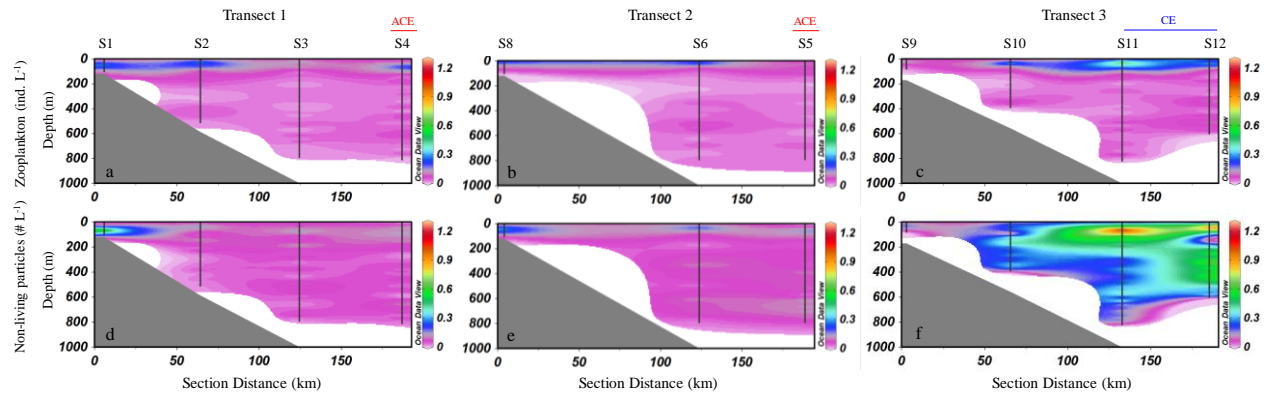

Fig. S2. Vertical distribution of zooplankton and non-living particle abundance along three transects in the study area. a-c: zooplankton (ind.  $L^{-1}$ ); d-f: non-living particles ( $\# L^{-1}$ ). ACE represents stations influenced by anticyclonic eddies, while CE represents stations influenced by cyclonic eddies. Figures generated using Ocean Data View (Schlitzer, Reiner, Ocean Data View, [odv.awi.de](http://odv.awi.de), 2024).

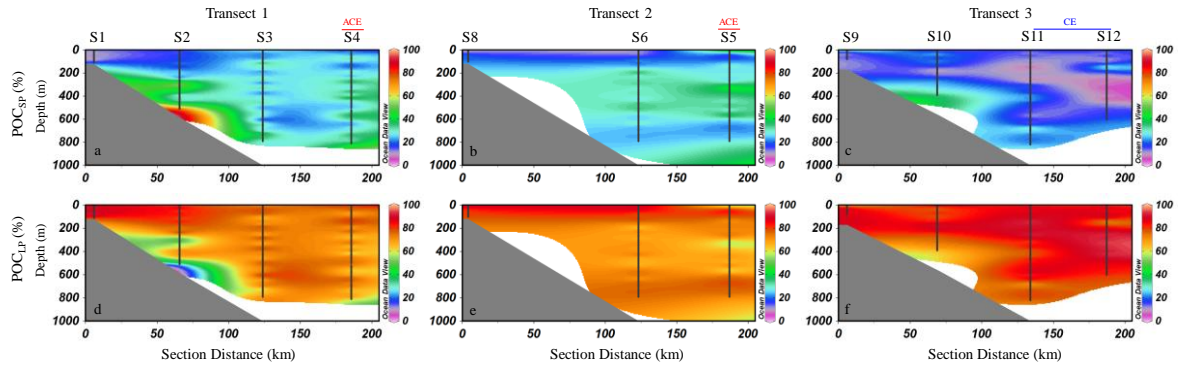

Fig. S3. Contribution of small and large particles to POC flux along the three transects. a-c: percentage contribution of small particles; d-f: percentage contribution of large particles. SP: small particles; LP: large particles. ACE represents stations influenced by anticyclonic eddies, while CE represents stations influenced by cyclonic eddies. Figures generated using Ocean Data View (Schlitzer, Reiner, Ocean Data View, [odv.awi.de](http://odv.awi.de), 2024).
